# Supplementary material for: Dental pulp stem cells-derived cannabidiol-treated organoid-like microspheroids show robust osteogenic potential via upregulation of WNT6
Source: PubMed Central journal article supplement — Commun Biol. 2024 Aug 10;7:972. doi: 10.1038/s42003-024-06655-y (PMC11315977; doi:10.1038/s42003-024-06655-y), 2024-08-10
Supplement: 42003_2024_6655_MOESM3_ESM.pdf [file 42003_2024_6655_MOESM3_ESM.pdf]

## **Description of Additional Supplementary Files**

**File name:** Supplementary Data

**Description:** The source data behind the graphs in the paper.

**File name:** Supplementary Movie 1

**Description:** 3D Visualization of Live / Dead Cells within DPSCs-microshperoids Captured with Confocal Microscopy

**File name:** Supplementary Movie 2

**Description:** Maximum Cross-Section Visualization of Live / Dead Cells within DPSCs-microshperoids Captured with Confocal Microscopy

**File name:** Supplementary Movie 3

**Description:** 3D Visualization of DPSCs-microshperoids Cytoskeleton Captured with Confocal Microscopy

**File name:** Supplementary Movie 4

**Description:** Maximum Cross-Section Visualization of microshperoids Cytoskeleton Captured with Confocal Microscopy
